# Supplementary material
Source: publisher site journal article supplement (https://www.dovepress.com/article/509928)
Supplement: Supplementary file 1 [file get_supplementary_file.php]

**Supplementary Table 1** Intergroup differences in stage IV patients between acral melanoma

and cutaneous melanoma.

|  | **Cutaneous (n=37) N(%)** | **Acral (n=57) N(%)** | **Total (n=94) N(%)** | **Pearson χ²** | ***P*** |
| --- | --- | --- | --- | --- | --- |
|
| **Age (years)** |  |  |  | 0.070 | 0.791 |
| <=65 | 25 (67.57) | 37 (64.91) | 62 (65.96) |  |  |
| >65 | 12 (32.43) | 20 (35.09) | 32 (34.04) |  |  |
| **Gender** |  |  |  | 0.423 | 0.515 |
| Male | 15 (40.54) | 27 (47.37) | 42 (44.68) |  |  |
| Female | 22 (59.46) | 30 (52.63) | 52 (55.32) |  |  |
| **BMI (kg/m2)** |  |  |  | - | 0.167 |
| <18.5 | 1 (2.70) | 5 (8.77) | 6 (6.38) |  |  |
| 18.5-23.9 | 28 (75.68) | 32 (56.14) | 60 (63.83) |  |  |
| >=24 | 8 (21.62) | 20 (35.09) | 28 (29.79) |  |  |
| **ECOG PS (points)** |  |  |  | 1.205 | 0.272 |
| <=1 | 27 (72.97) | 47 (82.46) | 74 (78.72) |  |  |
| >=2 | 10 (27.03) | 10 (17.54) | 20 (21.28) |  |  |
| **Lymph node metastasis** | |  |  | 0.036 | 0.850 |
| Negative | 11 (29.73) | 18 (31.58) | 29 (30.85) |  |  |
| Positive | 26 (70.27) | 39 (68.42) | 65 (69.15) |  |  |
| **In-transit metastasis** |  |  |  | 0.399 | 0.528 |
| Negative | 30 (81.08) | 49 (85.96) | 79 (84.04) |  |  |
| Positive | 7 (18.92) | 8 (14.04) | 15 (15.96) |  |  |
| **M stage** |  |  |  | 0.985 | 0.321 |
| M1a/M1b | 23 (62.16) | 41 (71.93) | 64 (68.09) |  |  |
| M1c/M1d | 14 (37.84) | 16 (28.07) | 30 (31.91) |  |  |
| **Number of metastatic sites** | |  |  | 0.001 | 0.979 |
| <=2 | 28 (75.68) | 43 (75.44) | 71 (75.53) |  |  |
| >=3 | 9 (24.32) | 14 (24.56) | 23 (24.47) |  |  |
| **Treatment lines** |  |  |  | 0.028 | 0.867 |
| 1 | 31 (83.78) | 47 (82.46) | 78 (82.98) |  |  |
| >=2 | 6 (16.22) | 10 (17.54) | 16 (17.02) |  |  |
| **NLR** |  |  |  | 0.791 | 0.374 |
| <=2.37 | 16 (43.24) | 30 (52.63) | 46 (48.94) |  |  |
| >2.37 | 21 (56.76) | 27 (47.37) | 48 (51.06) |  |  |
| **PNI** |  |  |  | 0.108 | 0.742 |
| <=42.65 | 8 (21.62) | 14 (24.56) | 22 (23.40) |  |  |
| >42.65 | 29 (78.38) | 43 (75.44) | 72 (76.60) |  |  |
| **RLR** |  |  |  | <0.001 | 0.992 |
| <=11.08 | 26 (70.27) | 40 (70.18) | 66 (70.21) |  |  |
| >11.08 | 11 (29.73) | 17 (29.82) | 28 (29.79) |  |  |

**Notes:** χ²: Chi-square test, -: Fisher exact

**Supplementary Figure 1**


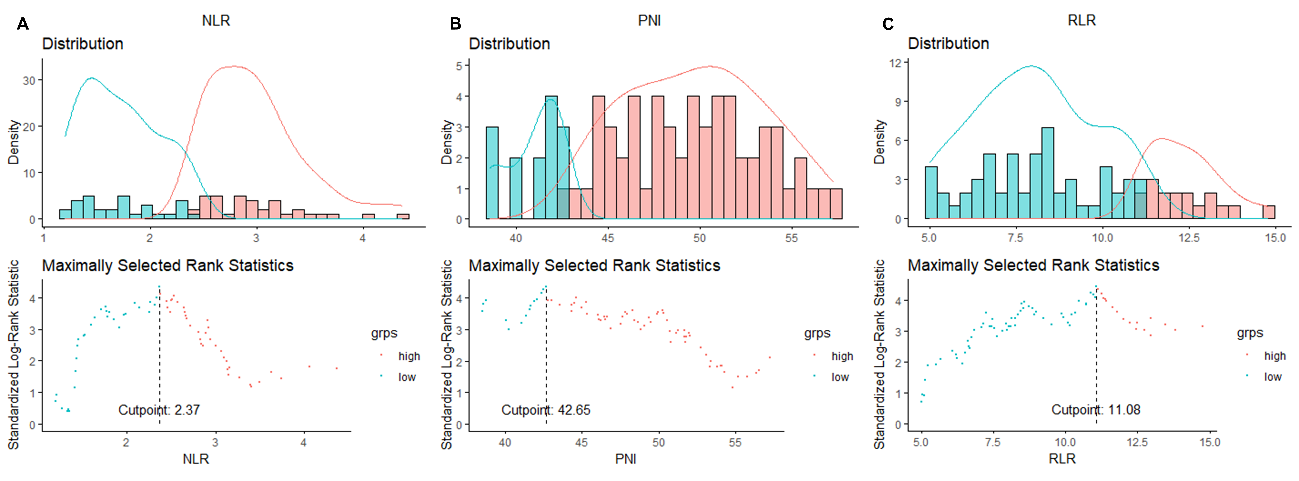


The cut-off values of inflammatory markers. (A) NLR. (B) PNI. (C) RLR.

**Supplementary Figure 2**


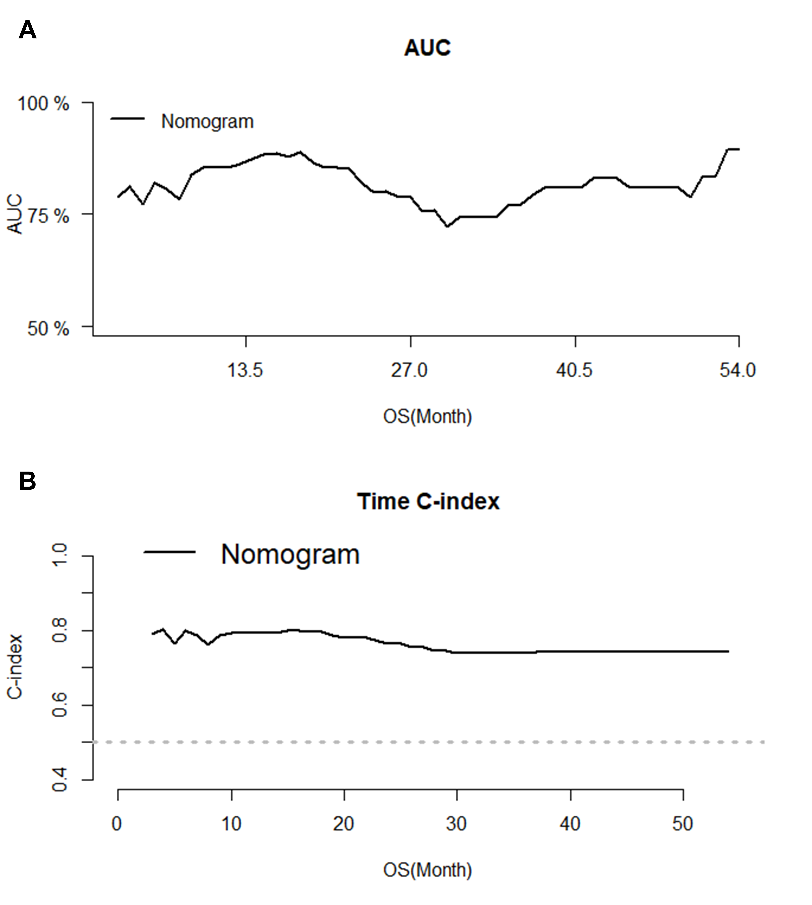


(A) Time‐dependent receiver operating characteristic curve (t-AUC) of the nomogram. (B) Time C-index of the nomogram.
